# Supplementary material for: A Comparative and Critical Analysis for In Vitro Cytotoxic Evaluation of Magneto-Crystalline Zinc Ferrite Nanoparticles Using MTT, Crystal Violet, LDH, and Apoptosis Assay
Source: MDPI journal article supplement (doi:10.3390/ijms241612860), 2023-08-16
Supplement: s1 [file s1]

# SUPPLEMENTARY INFORMATION

Article

## A Comparative and Critical Analysis for In Vitro Cytotoxic Evaluation of Magneto-Crystalline Zinc Ferrite Nanoparticles Using MTT, Crystal Violet, LDH, and Apoptosis Assay

Juan Luis de la Fuente-Jiménez <sup>1</sup>, César Iván Rodríguez-Rivas <sup>2</sup>, Irma Beatriz Mitre-Aguilar <sup>3</sup>, Andrea Torres-Copado <sup>1</sup>, Eric Alejandro García-López <sup>3</sup>, José Herrera-Celis <sup>4</sup>, María Goretti Arvizu-Espinosa <sup>1</sup>, Marco Antonio Garza-Navarro <sup>5</sup>, Luis Gerardo Arriaga <sup>4</sup>, Janet Ledesma García <sup>2</sup>, Domingo Ixcóatl García-Gutiérrez <sup>5</sup>, Alejandro Zentella Dehesa <sup>3,6,\*</sup>, Ashutosh Sharma <sup>1,\*</sup> and Goldie Oza <sup>4</sup>

<sup>1</sup> Centre of Bioengineering, School of Engineering and Sciences, Tecnológico de Monterrey, Campus Querétaro, Av. Epigmenio González, No. 500, Fracc. San Pablo, Querétaro 76130, Mexico; juan.luis.dela-fuente@tec.mx (J.L.d.l.F.-J.); a01700238@tec.mx (A.T.-C.); goretti@tec.mx (M.G.A.-E.)

<sup>2</sup> División de Investigación y Posgrado, Facultad de Ingeniería, Universidad Autónoma de Querétaro, Cerro de Las Campanas S/N, Querétaro 76010, Mexico; cesarmediuq@gmail.com (C.I.R.-R.); janet.le-desma@uaq.mx (J.L.G.)

<sup>3</sup> Unidad de Bioquímica, Instituto Nacional de Ciencias Médicas y Nutrición Salvador Zubirán, Vasco de Quiroga 15, Belisario Domínguez secc 16, Tlalpan, Mexico City 14080, Mexico; irma.mitre@incmnsz.mx (I.B.M.-A.); garcialp007@gmail.com (E.A.G.-L.)

<sup>4</sup> Centro de Investigación y Desarrollo Tecnológico en Electroquímica, Parque Tecnológico, Sanfandila, Pedro Escobedo, Querétaro 76703, Mexico; jlherrera@cideteq.mx (J.H.-C.); larriaga@cideteq.mx (L.G.A.); goza@cideteq.mx (G.O.)

<sup>5</sup> Facultad de Ingeniería Mecánica y Eléctrica, FIME, Universidad Autónoma de Nuevo León, UANL, Av. Universidad S/N, Cd. Universitaria, San Nicolás de los Garza 66450, Mexico; marco.garzanr@uanl.edu.mx (M.A.G.-N.); domingo.garciagt@uanl.edu.mx (D.I.G.-G.)

<sup>6</sup> Departamento de Medicina Genómica y Toxicología Ambiental, Programa Institucional de Cáncer de Mama, Instituto de Investigaciones Biomédicas IIB & Red de Apoyo a la Investigación, Universidad Nacional Autónoma de México, Ciudad Universitaria, Ave. Universidad 3000, Col. Copilco Universidad, Del. Coyoacán Ciudad de México, Mexico City 04510, Mexico

\* Correspondence: azentell@iibiomedicas.unam.mx (A.Z.D.); asharma@tec.mx (A.S.)

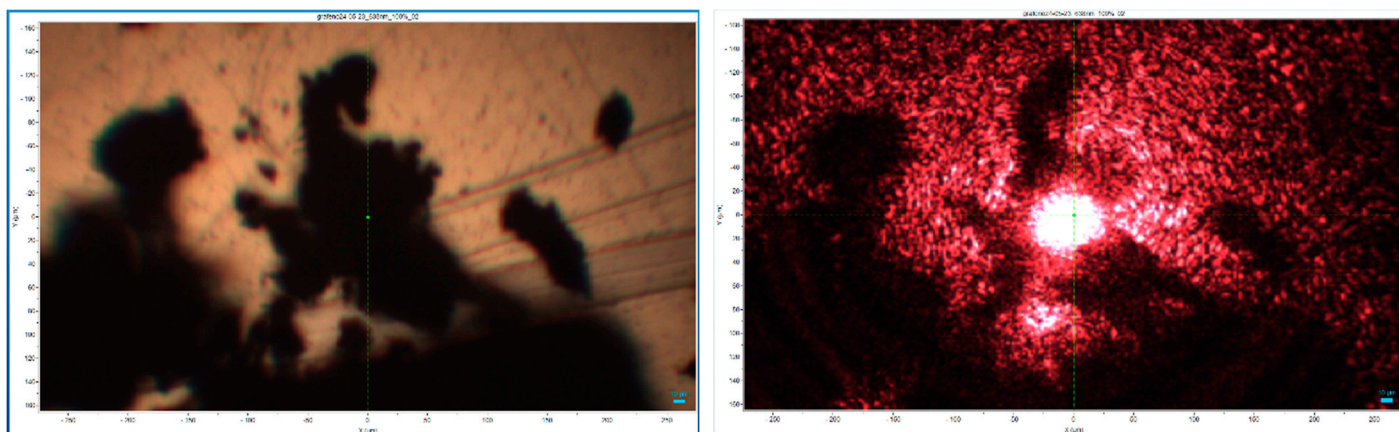

**Figure S1.** The microscopic image of ZFO NPs

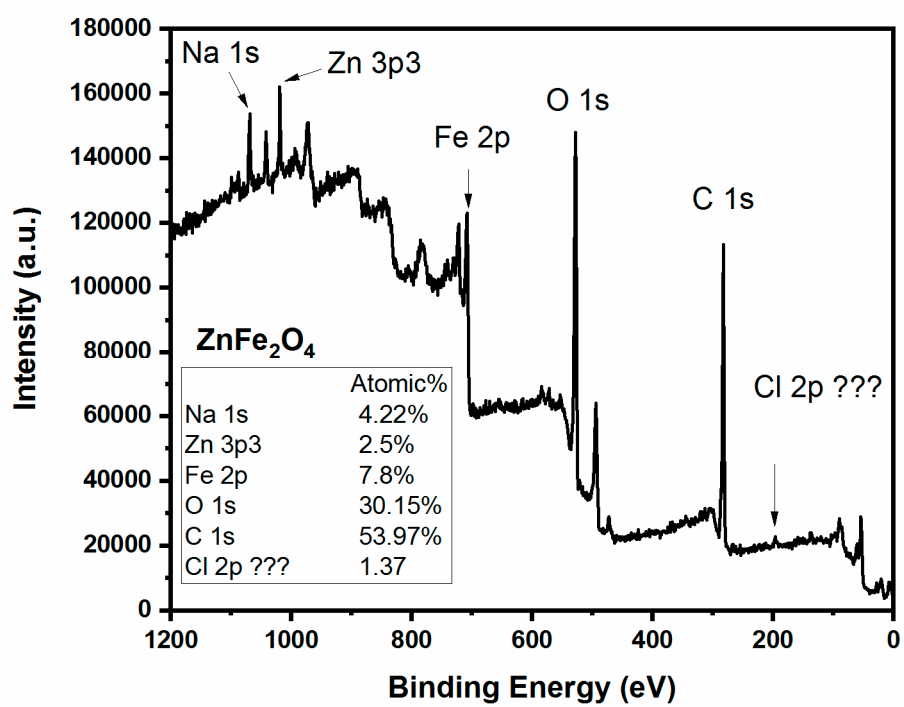

**Figure S2.** The complete survey scan of ZFO NPs

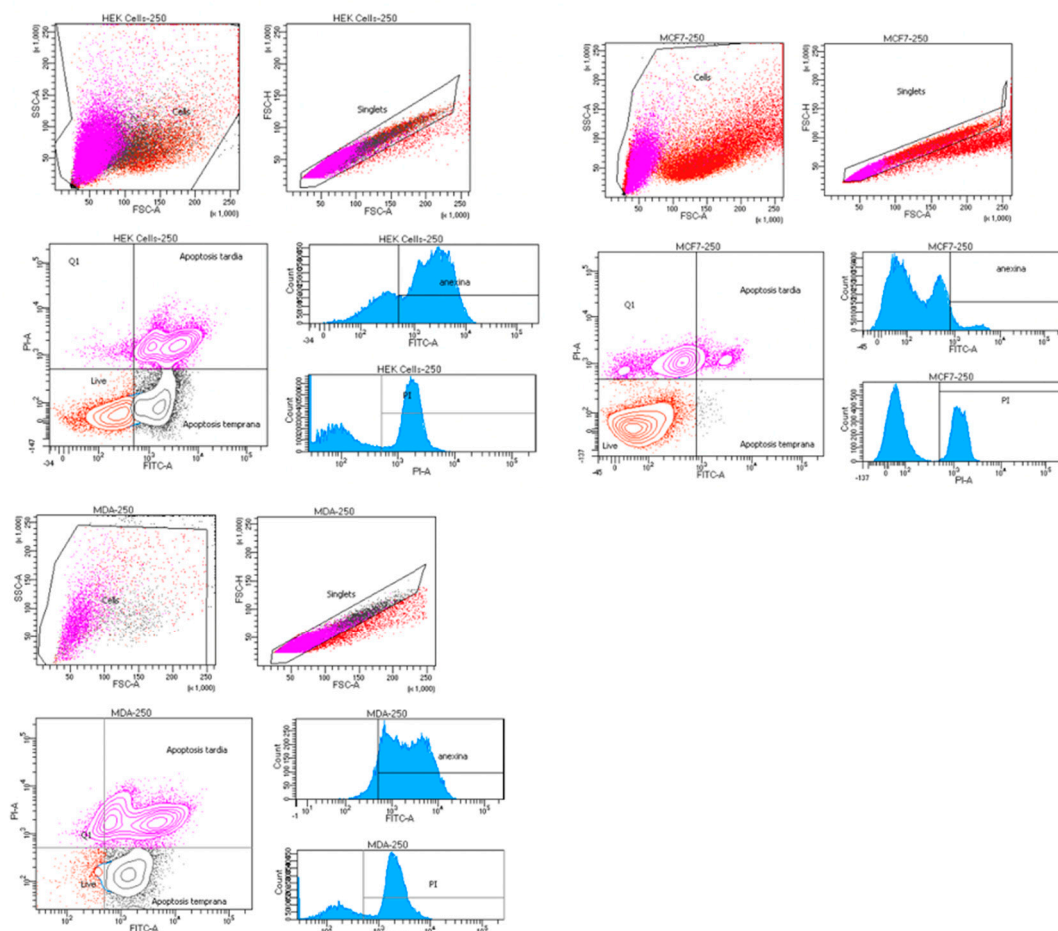

**Figure S3.** Representative information demonstrating the calibrated data and used gate between different cell lines (MDA-MB-231, MCF-7, and Hek-293) at the same exposed concentration (250  $\mu\text{g/mL}$ ) of zinc ferrite nanoparticles
